# Supplementary material for: H3N2 Influenza Infection Elicits More Cross-Reactive and Less Clonally Expanded Anti-Hemagglutinin Antibodies Than Influenza Vaccination
Source: PLOS journal article supplement (doi:10.1371/journal.pone.0025797), 2011-10-19
Supplement: S15 (10.1371/journal.pone.0025797.s015) [file journal.pone.0025797.s015]

**Table S2.** Clonal lineages of antibodies from EI subjects.

| Lineage ID | Subject ID | Isotype        | V <sub>H</sub> | J <sub>H</sub> | CDR H3 length | Light chain | V <sub>L</sub> | J <sub>L</sub> | CDR L3 length | Number of lineage members | Percent influenza reactive |
|------------|------------|----------------|----------------|----------------|---------------|-------------|----------------|----------------|---------------|---------------------------|----------------------------|
| 2342       | EI03       | A1             | 3-9            | 6              | 21            | λ           | 2-23           | 2              | 12            | 2                         | 0%                         |
| 1822       | EI05       | G3 (1), A2 (1) | 3-23           | 4              | 10            | κ           | 3-15           | 1              | 10            | 2                         | 0%                         |
| 1579       | EI05       | G3             | 3-23           | 5              | 15            | κ           | 3-20           | 1              | 9             | 2                         | 0%                         |
| 1799       | EI05       | G3             | 3-74           | 4              | 10            | λ           | 3-23           | 3              | 10            | 2                         | 0%                         |
| 1881       | EI05       | G3             | 4-61           | 3              | 16            | λ           | 1-40           | 2              | 11            | 2                         | 0%                         |
| 1813       | EI05       | G1 (2), G3 (1) | 4-61           | 3              | 16            | λ           | 1-40           | 3              | 11            | 3                         | 0%                         |
| 1849       | EI05       | A1 (2), A2 (1) | 4-61           | 4              | 14            | λ           | 3-1            | 2              | 9             | 3                         | 0%                         |
| 1803       | EI05       | G1             | 5-51           | 3              | 20            | κ           | 3-15           | 2              | 9             | 2                         | 0%                         |
| 1964       | EI12       | A2             | 3-48           | 4              | 7             | λ           | 5-45           | 3              | 9             | 2                         | 0%                         |
| 2569*      | EI13       | M (3), A1 (1)  | 1-46           | 3              | 10            | κ           | 2-24           | 2              | 9             | 4                         | 100%                       |
| 2566       | EI13       | G3 (1), A1 (1) | 3-15           | 4              | 16            | λ           | 1-47           | 3              | 10            | 2                         | 0%                         |
| 2582       | EI13       | G1             | 3-43           | 1              | 17            | κ           | 1-5            | 1              | 9             | 2                         | 100%                       |

No clonal lineages were identified in mAbs derived from subjects EI02 and EI07.

\*Tree for this clonal lineage appears in Figure 4.

Antibodies from a given TIV subject were identified as being a clonal lineage if they met the following criteria.

- 1) Inferred heavy and light chain rearrangements used the same V and J segments.
- 2) CDR 3 length are identical for both heavy and light chains.
- 3) 70% or greater nucleotide identity within CDR 3 for both heavy and light chains.
