# Supplementary material for: H3N2 Influenza Infection Elicits More Cross-Reactive and Less Clonally Expanded Anti-Hemagglutinin Antibodies Than Influenza Vaccination
Source: PLOS journal article supplement (doi:10.1371/journal.pone.0025797), 2011-10-19
Supplement: S18 (10.1371/journal.pone.0025797.s018) [file journal.pone.0025797.s018]

**Table S5.** Heavy chain family usage of influenza-specific rmAbs.

| Subject | Influenza-Specific rmAbs |           |             |             |          |   |   | Total |
|---------|--------------------------|-----------|-------------|-------------|----------|---|---|-------|
|         | Heavy Chain Family       |           |             |             |          |   |   |       |
|         | 1                        | 2         | 3           | 4           | 5        | 6 | 7 |       |
|         | N (%)                    |           |             |             |          |   |   |       |
| TIV01   | 5 (2.9%)                 | -*        | 56 (32.2%)  | 113 (64.9%) | -        | - | - | 174   |
| TIV04   | -                        | -         | 6 (75%)     | 2 (25%)     | -        | - | - | 8     |
| TIV14   | -                        | -         | 1 (100%)    | -           | -        | - | - | 1     |
| TIV21   | 6 (15.4%)                | 8 (20.5%) | 17 (43.6%)  | 8 (20.5%)   | -        | - | - | 39    |
| TIV24   | 2 (6.5%)                 | -         | 28 (90.3%)  | 1 (3.2%)    | -        | - | - | 31    |
| total   | 13 (5.1%)                | 8 (3.2%)  | 108 (42.7%) | 124 (49.0%) | -        | - | - | 253   |
|         |                          |           |             |             |          |   |   |       |
| EI02    | -                        | -         | 2 (50%)     | 2 (50%)     | -        | - | - | 4     |
| EI03    | 4 (40%)                  | 2 (20%)   | 1 (10%)     | 2 (20%)     | 1 (10%)  | - | - | 10    |
| EI05    | 1 (33.3%)                | 1 (33.3%) | -           | 1 (33.3%)   | -        | - | - | 3     |
| EI07    | 2 (66.7%)                | -         | 1 (33.3%)   | -           | -        | - | - | 3     |
| EI12    | -                        | -         | -           | -           | -        | - | - | 0     |
| EI13    | 7 (41.2%)                | -         | 9 (52.9%)   | -           | 1 (5.9%) | - | - | 17    |
| total   | 14 (37.8%)               | 3 (8.1%)  | 13 (35.1%)  | 5 (13.5%)   | 2 (5.4%) | - | - | 37    |

\* - = No antibodies of this heavy chain family isolated.
