# Supplementary material for: H3N2 Influenza Infection Elicits More Cross-Reactive and Less Clonally Expanded Anti-Hemagglutinin Antibodies Than Influenza Vaccination
Source: PLOS journal article supplement (doi:10.1371/journal.pone.0025797), 2011-10-19
Supplement: S19 (10.1371/journal.pone.0025797.s019) [file journal.pone.0025797.s019]

**Table S6.** Heavy chain family usage of isolated rmAbs not specific for influenza antigens.

| Subject      | rmAbs Not Specific for Influenza |                  |                    |                   |                  |                 |   | Total<br>N |
|--------------|----------------------------------|------------------|--------------------|-------------------|------------------|-----------------|---|------------|
|              | Heavy Chain Family               |                  |                    |                   |                  |                 |   |            |
|              | 1                                | 2                | 3                  | 4                 | 5                | 6               | 7 |            |
|              | N (%)                            |                  |                    |                   |                  |                 |   |            |
| TIV01        | 9 (12.5%)                        | -*               | 37 (51.4%)         | 25 (34.7%)        | 1 (1.4%)         | -               | - | 72         |
| TIV04        | -                                | 1 (11.1%)        | 6 (66.7%)          | 2 (22.2%)         | -                | -               | - | 9          |
| TIV14        | 5 (33.3%)                        | -                | 8 (53.3%)          | 1 (6.7%)          | 1 (6.7%)         | -               | - | 15         |
| TIV21        | 1 (50%)                          | -                | 1 (50%)            | -                 | -                | -               | - | 2          |
| TIV24        | 10 (18.5%)                       | -                | 39 (72.2%)         | 4 (7.4%)          | 1 (1.9%)         | -               | - | 54         |
| <b>total</b> | <b>25 (16.4%)</b>                | <b>1 (0.7%)</b>  | <b>91 (59.9%)</b>  | <b>32 (21.1%)</b> | <b>3 (2%)</b>    | -               | - | <b>152</b> |
| EI02         | 3 (11.1%)                        | -                | 16 (59.3%)         | 6 (22.2%)         | 1 (3.7%)         | 1 (3.7%)        | - | 27         |
| EI03         | 15 (15.3%)                       | 6 (6.1%)         | 51 (52%)           | 19 (19.4%)        | 7 (7.1%)         | -               | - | 98         |
| EI05         | 18 (13%)                         | 5 (3.6%)         | 77 (55.8%)         | 28 (20.3%)        | 8 (5.8%)         | 2 (1.4%)        | - | 138        |
| EI07         | 6 (19.4%)                        | 1 (3.2%)         | 15 (48.4%)         | 6 (19.4%)         | 3 (9.7%)         | -               | - | 31         |
| EI12         | 5 (9.8%)                         | -                | 36 (70.6%)         | 6 (11.8%)         | 3 (5.9%)         | 1 (2%)          | - | 51         |
| EI13         | 10 (14.5%)                       | 2 (2.9%)         | 48 (69.6%)         | 8 (11.6%)         | -                | 1 (1.4%)        | - | 69         |
| <b>total</b> | <b>57 (13.8%)</b>                | <b>14 (3.4%)</b> | <b>243 (58.7%)</b> | <b>73 (17.6%)</b> | <b>22 (5.3%)</b> | <b>5 (1.2%)</b> | - | <b>414</b> |

\* - = No antibodies of this heavy chain family isolated.
