# Supplementary material for: H3N2 Influenza Infection Elicits More Cross-Reactive and Less Clonally Expanded Anti-Hemagglutinin Antibodies Than Influenza Vaccination
Source: PLOS journal article supplement (doi:10.1371/journal.pone.0025797), 2011-10-19
Supplement: S21 (10.1371/journal.pone.0025797.s021) [file journal.pone.0025797.s021]

**Table S8.** Kappa chain family usage of isolated rmAbs not specific for influenza antigens.

| Subject | rmAbs Not Specific for Influenza |            |            |           |    |          |   |          |          |          |    | Total |
|---------|----------------------------------|------------|------------|-----------|----|----------|---|----------|----------|----------|----|-------|
|         | Kappa Chain Family               |            |            |           |    |          |   |          |          |          |    |       |
|         | 1                                | 2          | 3          | 4         | 5  | 6        | 7 | 1D       | 2D       | 3D       | 6D |       |
|         | N (%)                            |            |            |           |    |          |   |          |          |          |    |       |
| TIV01   | 30 (63.8%)                       | 4 (8.5%)   | 7 (14.9%)  | 4 (8.5%)  | _* | -        | - | -        | 2 (4.3%) | -        | -  | 47    |
| TIV04   | 4 (80%)                          | -          | 1 (20%)    | -         | -  | -        | - | -        | -        | -        | -  | 5     |
| TIV14   | 3 (27.3%)                        | 1 (9.1%)   | 4 (36.4%)  | 2 (18.2%) | -  | -        | - | -        | 1 (9.1%) | -        | -  | 11    |
| TIV21   | -                                | -          | -          | -         | -  | -        | - | -        | -        | -        | -  | 0     |
| TIV24   | 28 (66.7%)                       | 3 (7.1%)   | 6 (14.3%)  | 3 (7.1%)  | -  | -        | - | 1 (2.4%) | -        | 1 (2.4%) | -  | 42    |
| total   | 65 (61.9%)                       | 8 (7.6%)   | 18 (17.1%) | 9 (8.6%)  | -  | -        | - | 1 (1%)   | 3 (2.9%) | 1 (1%)   | -  | 105   |
|         |                                  |            |            |           |    |          |   |          |          |          |    |       |
| EI02    | 8 (36.4%)                        | 6 (27.3%)  | 7 (31.8%)  | 1 (4.5%)  | -  | -        | - | -        | -        | -        | -  | 22    |
| EI03    | 33 (52.4%)                       | 7 (11.1%)  | 19 (30.2%) | 4 (6.3%)  | -  | -        | - | -        | -        | -        | -  | 63    |
| EI05    | 35 (38.5%)                       | 9 (9.9%)   | 38 (41.8%) | 7 (7.7%)  | -  | 1 (1.1%) | - | -        | 1 (1.1%) | -        | -  | 91    |
| EI07    | 12 (50%)                         | -          | 12 (50%)   | -         | -  | -        | - | -        | -        | -        | -  | 24    |
| EI12    | 24 (57.1%)                       | 7 (16.7%)  | 8 (19%)    | 3 (7.1%)  | -  | -        | - | -        | -        | -        | -  | 42    |
| EI13    | 28 (57.1%)                       | 11 (22.4%) | 8 (16.3%)  | 2 (4.1%)  | -  | -        | - | -        | -        | -        | -  | 49    |
| total   | 140 (48.1%)                      | 40 (13.7%) | 92 (31.6%) | 17 (5.8%) | -  | 1 (0.3%) | - | -        | 1 (0.3%) | -        | -  | 291   |

\* - = No antibodies of this kappa chain family isolated.
