# Supplementary material for: H3N2 Influenza Infection Elicits More Cross-Reactive and Less Clonally Expanded Anti-Hemagglutinin Antibodies Than Influenza Vaccination
Source: PLOS journal article supplement (doi:10.1371/journal.pone.0025797), 2011-10-19
Supplement: S22 (10.1371/journal.pone.0025797.s022) [file journal.pone.0025797.s022]

**Table S9.** Lambda chain family usage of isolated influenza-specific rmAbs.

| Subject | Influenza-Specific rmAbs |            |            |    |   |          |          |   |   |          |    | Total |
|---------|--------------------------|------------|------------|----|---|----------|----------|---|---|----------|----|-------|
|         | Lambda Chain Family      |            |            |    |   |          |          |   |   |          |    |       |
|         | 1                        | 2          | 3          | 4  | 5 | 6        | 7        | 8 | 9 | 10       | 11 |       |
|         | N (%)                    |            |            |    |   |          |          |   |   |          |    |       |
| TIV01   | 33 (47.1%)               | 10 (14.3%) | 23 (32.9%) | _* | - | 1 (1.4%) | 2 (2.9%) | - | - | 1 (1.4%) | -  | 70    |
| TIV04   | 5 (62.5%)                | 1 (12.5%)  | 2 (25%)    | -  | - | -        | -        | - | - | -        | -  | 8     |
| TIV14   | 1 (100%)                 | -          | -          | -  | - | -        | -        | - | - | -        | -  | 1     |
| TIV21   | 3 (20%)                  | 2 (13.3%)  | 9 (60%)    | -  | - | 1 (6.7%) | -        | - | - | -        | -  | 15    |
| TIV24   | 9 (64.3%)                | -          | 4 (28.6%)  | -  | - | -        | -        | - | - | 1 (7.1%) | -  | 14    |
| total   | 51 (47.2%)               | 13 (12.0%) | 38 (35.2%) | -  | - | 2 (1.9%) | 2 (1.9%) | - | - | 2 (1.9%) | -  | 108   |
|         |                          |            |            |    |   |          |          |   |   |          |    |       |
| EI02    | 1 (100%)                 | -          | -          | -  | - | -        | -        | - | - | -        | -  | 1     |
| EI03    | 2 (100%)                 | -          | -          | -  | - | -        | -        | - | - | -        | -  | 2     |
| EI05    | 1 (100%)                 | -          | -          | -  | - | -        | -        | - | - | -        | -  | 1     |
| EI07    | -                        | -          | -          | -  | - | -        | -        | - | - | -        | -  | 0     |
| EI12    | -                        | -          | -          | -  | - | -        | -        | - | - | -        | -  | 0     |
| EI13    | 4 (80%)                  | 1 (20%)    | -          | -  | - | -        | -        | - | - | -        | -  | 5     |
| total   | 8 (88.9%)                | 1 (11.1%)  | -          | -  | - | -        | -        | - | - | -        | -  | 9     |

\* - = No antibodies of this lambda chain family isolated.
