# Supplementary material for: H3N2 Influenza Infection Elicits More Cross-Reactive and Less Clonally Expanded Anti-Hemagglutinin Antibodies Than Influenza Vaccination
Source: PLOS journal article supplement (doi:10.1371/journal.pone.0025797), 2011-10-19
Supplement: S23 (10.1371/journal.pone.0025797.s023) [file journal.pone.0025797.s023]

**Table S10.** Lambda chain family usage of isolated rmAbs not specific for influenza antigens.

| Subject      | rmAbs Not Specific for Influenza |                   |                   |                 |                 |                 |                 |                 |   |                 |    | Total<br>N |
|--------------|----------------------------------|-------------------|-------------------|-----------------|-----------------|-----------------|-----------------|-----------------|---|-----------------|----|------------|
|              | Lambda Chain Family              |                   |                   |                 |                 |                 |                 |                 |   |                 |    |            |
|              | 1                                | 2                 | 3                 | 4               | 5               | 6               | 7               | 8               | 9 | 10              | 11 |            |
|              | N (%)                            |                   |                   |                 |                 |                 |                 |                 |   |                 |    |            |
| TIV01        | 13 (52%)                         | 2 (8%)            | 7 (28%)           | -*              | -               | -               | 3 (12%)         | -               | - | -               | -  | 25         |
| TIV04        | -                                | 3 (75%)           | 1 (25%)           | -               | -               | -               | -               | -               | - | -               | -  | 4          |
| TIV14        | -                                | -                 | 3 (75%)           | -               | -               | -               | -               | 1 (25%)         | - | -               | -  | 4          |
| TIV21        | -                                | -                 | 1 (50%)           | -               | -               | -               | 1 (50%)         | -               | - | -               | -  | 2          |
| TIV24        | -                                | 4 (33.3%)         | 5 (41.7%)         | 1 (8.3%)        | -               | 1 (8.3%)        | -               | 1 (8.3%)        | - | -               | -  | 12         |
| <b>total</b> | <b>13 (27.7%)</b>                | <b>9 (19.1%)</b>  | <b>17 (36.2%)</b> | <b>1 (2.1%)</b> | -               | <b>1 (2.1%)</b> | <b>4 (8.5%)</b> | <b>2 (4.3%)</b> | - | -               | -  | <b>47</b>  |
| EI02         | -                                | -                 | 1 (20%)           | 1 (20%)         | 1 (20%)         | 1 (20%)         | -               | 1 (20%)         | - | -               | -  | 35         |
| EI03         | 12 (34.3%)                       | 10 (28.6%)        | 2 (5.7%)          | 3 (8.6%)        | -               | 1 (2.9%)        | 4 (11.4%)       | 3 (8.6%)        | - | -               | -  | 47         |
| EI05         | 18 (38.3%)                       | 11 (23.4%)        | 11 (23.4%)        | 1 (2.1%)        | 1 (2.1%)        | 2 (4.3%)        | -               | 1 (2.1%)        | - | 2 (4.3%)        | -  | 7          |
| EI07         | 1 (14.3%)                        | 3 (42.9%)         | 3 (42.9%)         | -               | -               | -               | -               | -               | - | -               | -  | 9          |
| EI12         | 1 (11.1%)                        | 1 (11.1%)         | 1 (11.1%)         | 1 (11.1%)       | 5 (55.6%)       | -               | -               | -               | - | -               | -  | 20         |
| EI13         | 8 (40%)                          | 8 (40%)           | 3 (15%)           | -               | -               | -               | -               | -               | - | 1 (5%)          | -  | 123        |
| <b>total</b> | <b>40 (32.5%)</b>                | <b>33 (26.8%)</b> | <b>21 (17.1%)</b> | <b>6 (4.9%)</b> | <b>7 (5.7%)</b> | <b>4 (3.3%)</b> | <b>4 (3.3%)</b> | <b>5 (4.1%)</b> | - | <b>3 (2.4%)</b> | -  | <b>123</b> |

\* - = No antibodies of this lambda chain family isolated.
